# Supplementary material
Source: PubMed Central journal article supplement (PMC3252916)
Supplement: 1118560109_pnas.201118560SI.pdf [file 1118560109_pnas.201118560SI.pdf]

# Supporting Information

Li et al. 10.1073/pnas.1118560109

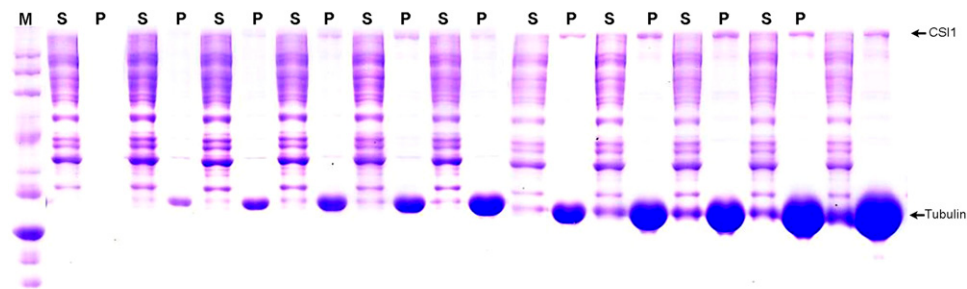

**Fig. S1.** Microtubule-binding assay of CESA interactive protein 1 (CSI1). For measurement of binding affinity, increasing amounts of taxol-stabilized tubulin were incubated with 0.7  $\mu$ M purified CSI1 protein for 30 min at room temperature. After centrifugation, 5  $\mu$ L of each pellet was resolved by SDS/PAGE and visualized by Coomassie blue staining. A representative gel from three technical replicates used for dissociation constant calculation is shown. The positions of CSI1 and tubulin are indicated by arrows. S, supernatant fraction; P, pellet fraction.

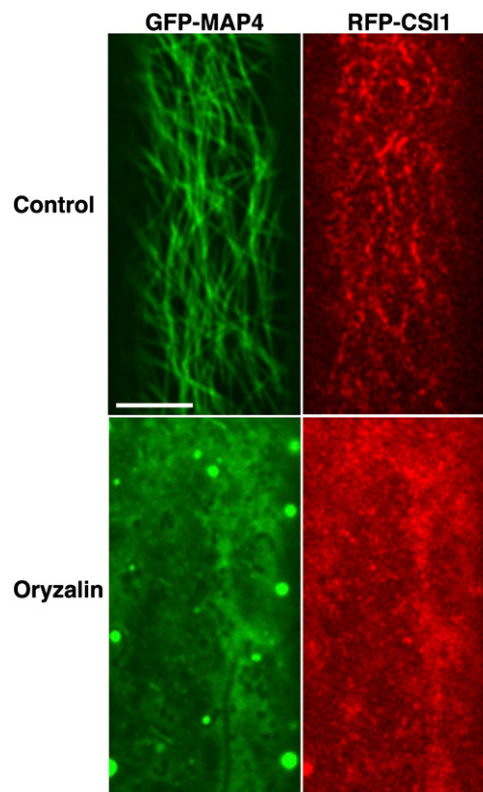

**Fig. S2.** CSI1 localization is microtubule dependent. Epidermal cells in 3-d-old dark-grown hypocotyls coexpressing GFP-MAP4-MBD and RFP-CSI1 were incubated in Murashige and Skoog liquid solution containing diluted methanol control or 20  $\mu$ M oryzalin for 7 h. A single optical section of GFP-MAP4-MBD or RFP-CSI1 was acquired. Representative images from 22 cells in nine seedlings upon oryzalin treatment are shown. (Scale bar, 5  $\mu$ m.)

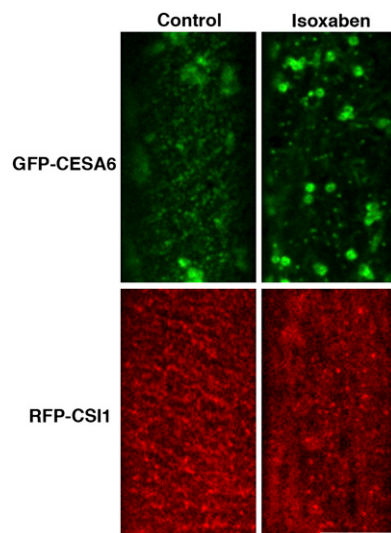

**Fig. S3.** CS11 localization requires the integrity of CESA complexes. Epidermal cells in 3-d-old dark-grown hypocotyls expressing GFP-CESA6 or RFP-CS11 were incubated in Murashige and Skoog liquid solution containing diluted DMSO control or 100 nM isoxaben for 30 min. Representative optical sections of GFP-CESA6 ( $n = 15$  cells) or RFP-CS11 ( $n = 21$  cells) are shown. (Scale bar, 5  $\mu\text{m}$ .)

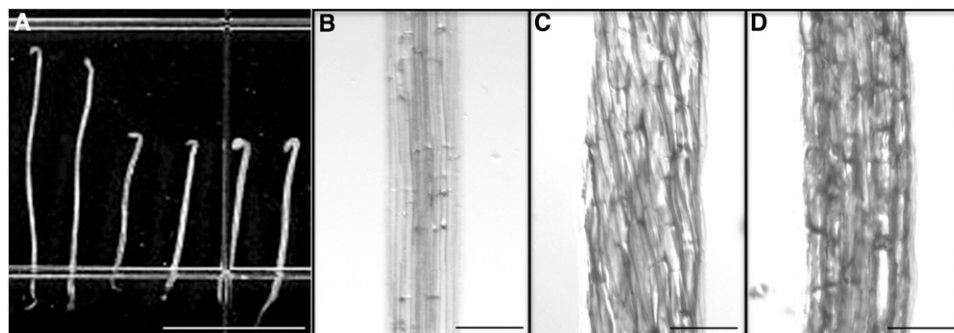

**Fig. S4.** Oryzalin phenocopies anisotropic growth defect in *csi1* hypocotyls. (A) Four-day-old dark-grown hypocotyls. Pairs of seedlings from left to right are the following: Col-0, Col-0 treated with 200 nM oryzalin, and *csi1-3*. (Scale bar, 5 mm.) (B–D) High magnification of growth morphology of 4-d-old dark-grown wild-type hypocotyls with mock treatment (B) and with 300 nM oryzalin (C). Anisotropic growth defect of wild type with 300 nM oryzalin was indistinguishable from *csi1-3* (D). (Scale bar, 5  $\mu$ m.)

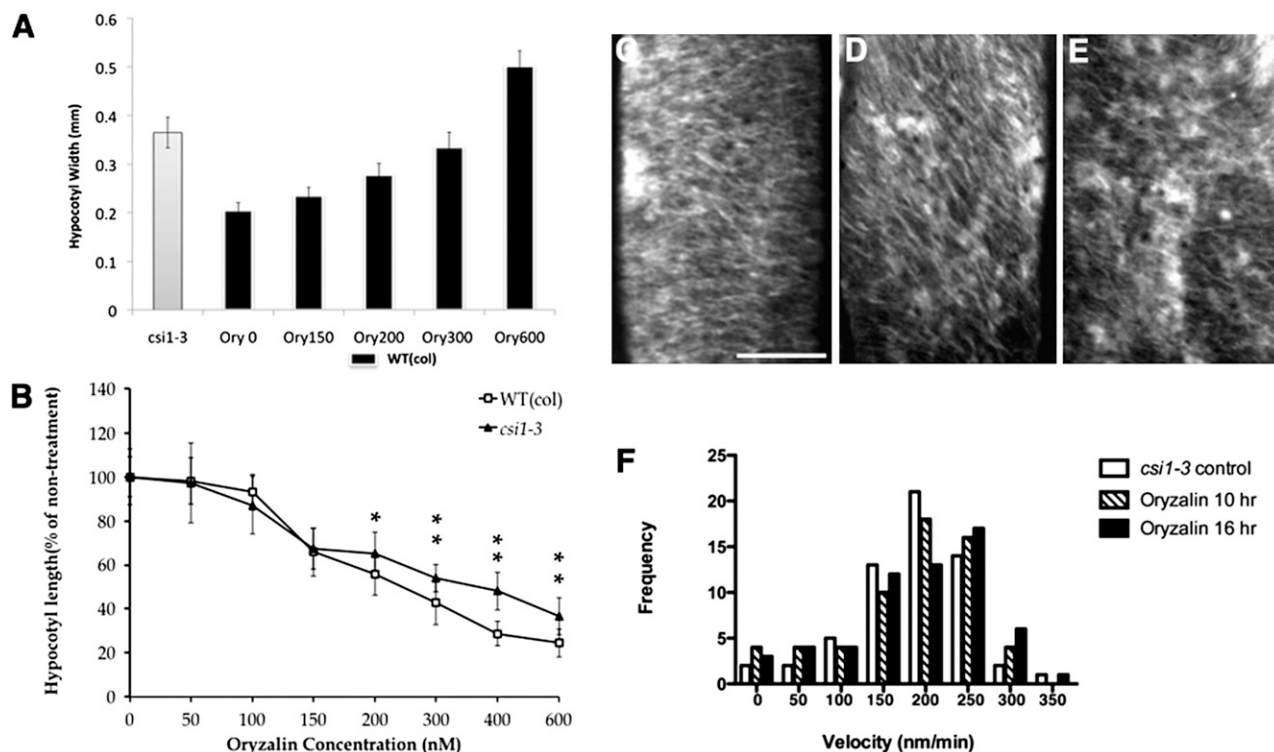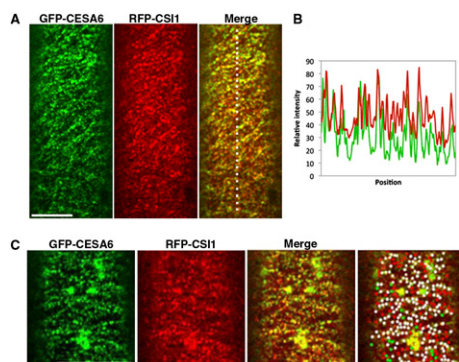

**Fig. S6.** Colocalization of cellulose synthase (CESA) complexes and CSI1. (A) Two-channel imaging of epidermal cells in 3-d-old dark-grown hypocotyls expressing markers for CESA complexes (GFP-CESA6) and CSI1 (RFP-CSI1). A single optical section was acquired. (Scale bar, 5  $\mu$ m.) (B) Plot of a line scan showing a strong correlation between GFP-CESA6 and RFP-CSI1; line is indicated in merge image (A). (C) Quantification of colocalization of CESA complexes and CSI1. White dots represent colocalized GFP-CESA6 and RFP-CSI1. RFP-CSI1 and GFP-CESA6 that did not colocalize are green and red, respectively. Analysis was performed in five cells from five seedlings (Table 1). (Scale bar, 10  $\mu$ m.)



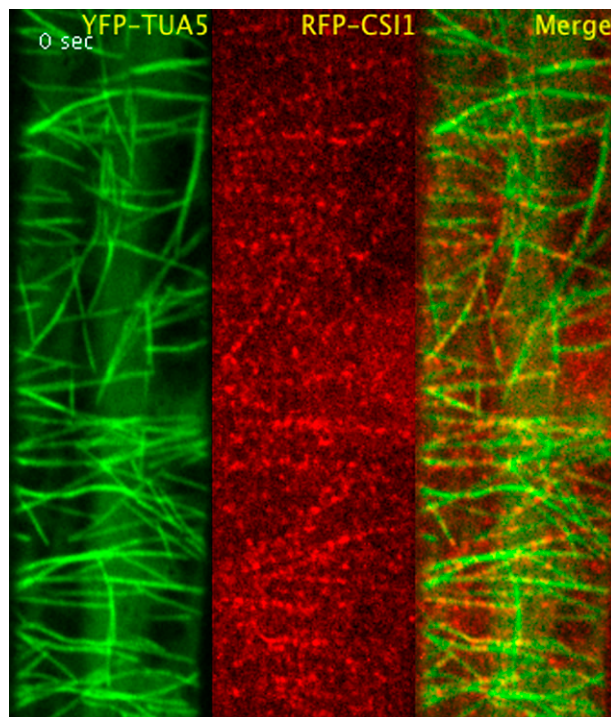

**Movie S1.** CSI1 particles travel along cortical microtubules. Epidermal cells in 3-d-old dark-grown hypocotyls coexpressing RFP-CSI1 and YFP-TUA5 were imaged in the plane of plasma membrane. Time series are 5 min long at 5-s intervals. Frame rate = 7 fps.

[Movie S1](#)

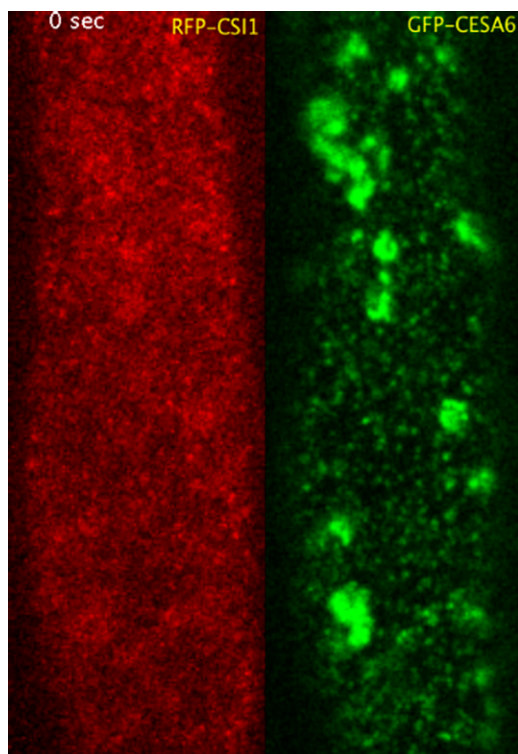

**Movie S2.** Two-channel imaging of epidermal cells in 3-d-old dark-grown hypocotyls coexpressing RFP-CSI1 and GFP-CESA6. Two-day-old dark-grown hypocotyls were incubated in Murashige and Skoog liquid solution containing 20  $\mu$ M oryzalin for 10 h before imaging. Time series are 5 min long at 5-s intervals. Frame rate = 7 fps.

[Movie S2](#)

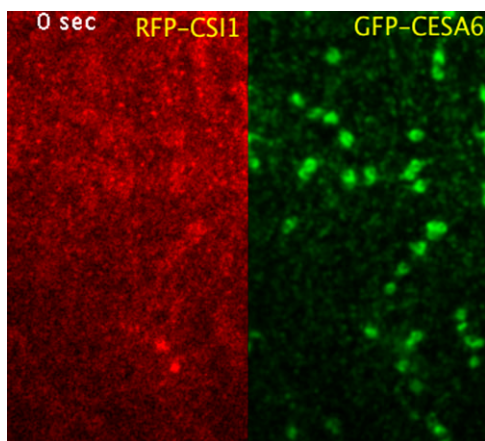

**Movie S3.** Two-channel imaging of epidermal cells in 3-d-old dark-grown hypocotyls coexpressing RFP-CSI1 and GFP-CESA6. Two-day-old dark-grown hypocotyls were incubated in Murashige and Skoog liquid solution containing 20  $\mu$ M oryzalin for 16 h before imaging. Time series are 5 min long at 5-s intervals. Frame rate = 7 fps.

[Movie S3](#)

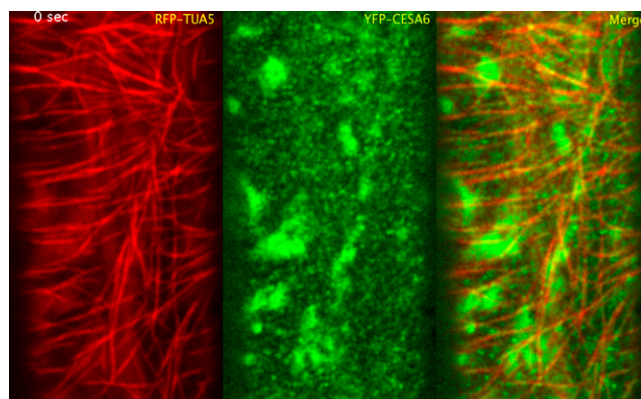

**Movie S4.** Two-channel imaging of epidermal cells in 3-d-old dark-grown hypocotyls coexpressing RFP-TUA5 and YFP-CESA6 in *csi1-3*. Time series are 2 min long at 5-s intervals. Frame rate = 7 fps.

[Movie S4](#)

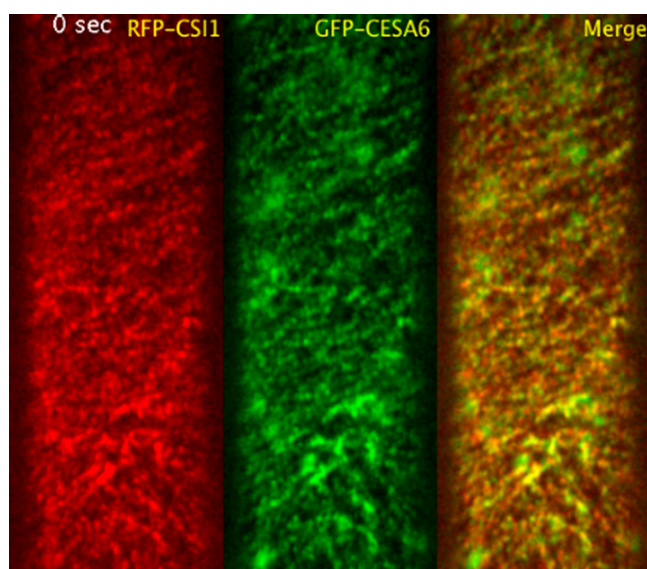

**Movie S5.** Dynamic association of CESA and CSI1. Epidermal cells in 3-d-old dark-grown hypocotyls coexpressing RFP-CSI1 and GFP-CESA6 were imaged in the plane of plasma membrane. Majority of CESA and CSI1 particles travel simultaneously along a linear track. Time series are 5 min long at 5-s intervals. Frame rate = 7 fps.

[Movie S5](#)
